# Supplementary material for: Multi-omics delineate growth factor network underlying exercise effects in an Alzheimer’s mouse model
Source: PubMed Central journal article supplement — bioRxiv. 2024 May 5:2024.05.02.592289. Preprint. [Version 1] doi: 10.1101/2024.05.02.592289 (PMC11092636; doi:10.1101/2024.05.02.592289), 2024-05-05

**Title:** Multi-omics delineate growth factor network underlying exercise effects in an Alzheimer's mouse model

## SUPPLEMENTARY TABLES

**Supplemental Table S1. RNA in excitatory neurons**

**Supplemental Table S2. RNA in inhibitory neurons.**

**Supplemental Table S3. RNA in oligodendrocytes.**

**Supplemental Table S4. RNA in oligodendrocyte progenitor cells.**

**Supplemental Table S5. RNA in astrocytes.**

**Supplemental Table S6. RNA in microglia.**

**Supplemental Table S7. GSEA results of DEGs for APP\_RT vs. WT\_RT**

**Supplemental Table S8. GSEA results of DEGs for APP\_EX vs. APP\_RT**

**Supplemental Table S9. GSEA results of DEGs for DEGs WT\_EX vs. WT\_RT**

**Supplemental Table S10. GSEA results of the EGFR signaling pathway.**

**Supplemental Table S11. GSEA results of the insulin signaling pathway.**

**Supplemental Table S12. Overlap of EGFR signaling with TFs targets genes in network analysis.**

**Supplemental Table S13. Overlap of Insulin signaling with TFs targets genes in network analysis.**

## SUPPLEMENTARY FIGURE LEGENDS

**Supplemental Figure S1. Behavioral analysis of WT and APP<sup>NL-G-F</sup> mice.**

(a) Average daily exercise volume per mouse. n = 8 WT mice, n = 9 APP<sup>NL-G-F</sup> mice. (b) Body weight, n = 12 mice for WT\_RT, n = 8 mice for WT\_EX; 10 mice for APP\_RT; 9 mice for APP\_EX. (c) Total distance in the standard 2-object OLT (n = 12 for WT\_RT; 8 for WT\_EX; 10 for APP\_RT; and 9 for APP\_EX). (d) Total distance in the Y-maze test (n = 12 for WT\_RT; 8 for WT\_EX; 10 for APP\_RT; and 9 for APP\_EX). Bar graphs show the mean with S.E.M. Asterisks indicate significant difference by two-way ANOVA. ns, not significant.

**Supplemental Figure S2. Exercise activates growth factor signaling.** (a) Proportions of major cell clusters based on snRNA-seq and snATAC-seq. (b) The number of DEGs from the indicated comparisons. (c) The number of significantly enriched pathways in DEGs from the indicated comparisons. (d) List of significantly enriched pathways in DEGs from the indicated comparisons.

**Supplemental Figure S3. DEGs with the reversed pattern from snRNA-seq analysis.**

(a) GSEA analyses of the EGFR signaling pathway, a top common enriched pathway in reversed DEGs in different cell types. (b) Heat map of reversed DEGs within the EGFR signaling in different cell types.

**Supplemental Figure S4. DARs from snATAC-seq analysis.**

(a) The number of DARs from the indicated comparisons. (b) Number of significantly enriched pathways in DARs from the indicated comparisons. (c) List of significantly enriched motifs in the indicated DARs. (d) Scatter plot of chromatin regions with negative correlations between the exercise-induced (APP\_EX vs. APP\_RT) and amyloid-induced (APP\_RT vs. WT\_RT) accessibility changes across different cell clusters.

**Supplemental Figure S5. Transcriptional regulatory network in excitatory neurons.**

**Supplemental Figure S6. Transcriptional regulatory network in inhibitory neurons.**

**Supplemental Figure S7. Transcriptional regulatory network in oligodendrocytes.**

**Supplemental Figure S8. Transcriptional regulatory network in oligodendrocyte precursor cells.**

**Supplemental Figure S9. Transcriptional regulatory network in astrocytes.**

**Supplemental Figure S10. Transcriptional regulatory network in microglia.**

**Supplemental Figure S11. Spatial expression reconstruction.**

Heat map of DG and CA1/2 landmark genes, Prox1 and Ociad2, in WT\_RT mouse hippocampus after spatial expression reconstruction according to a previous spatial transcriptomics dataset.

## Supplementary Figure S1

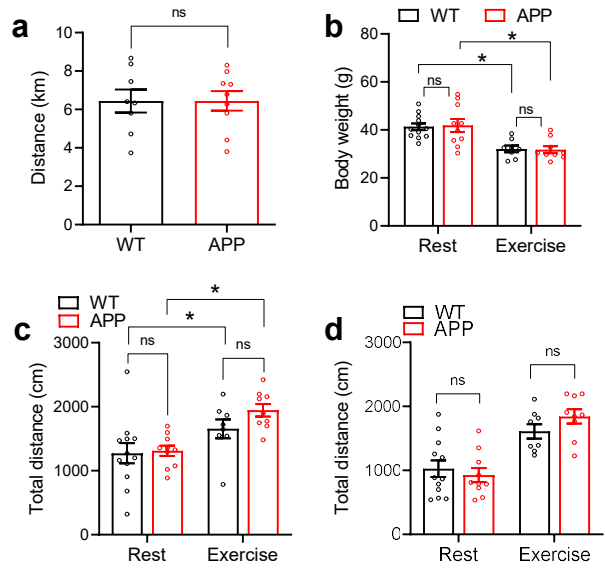

**Figure S2**

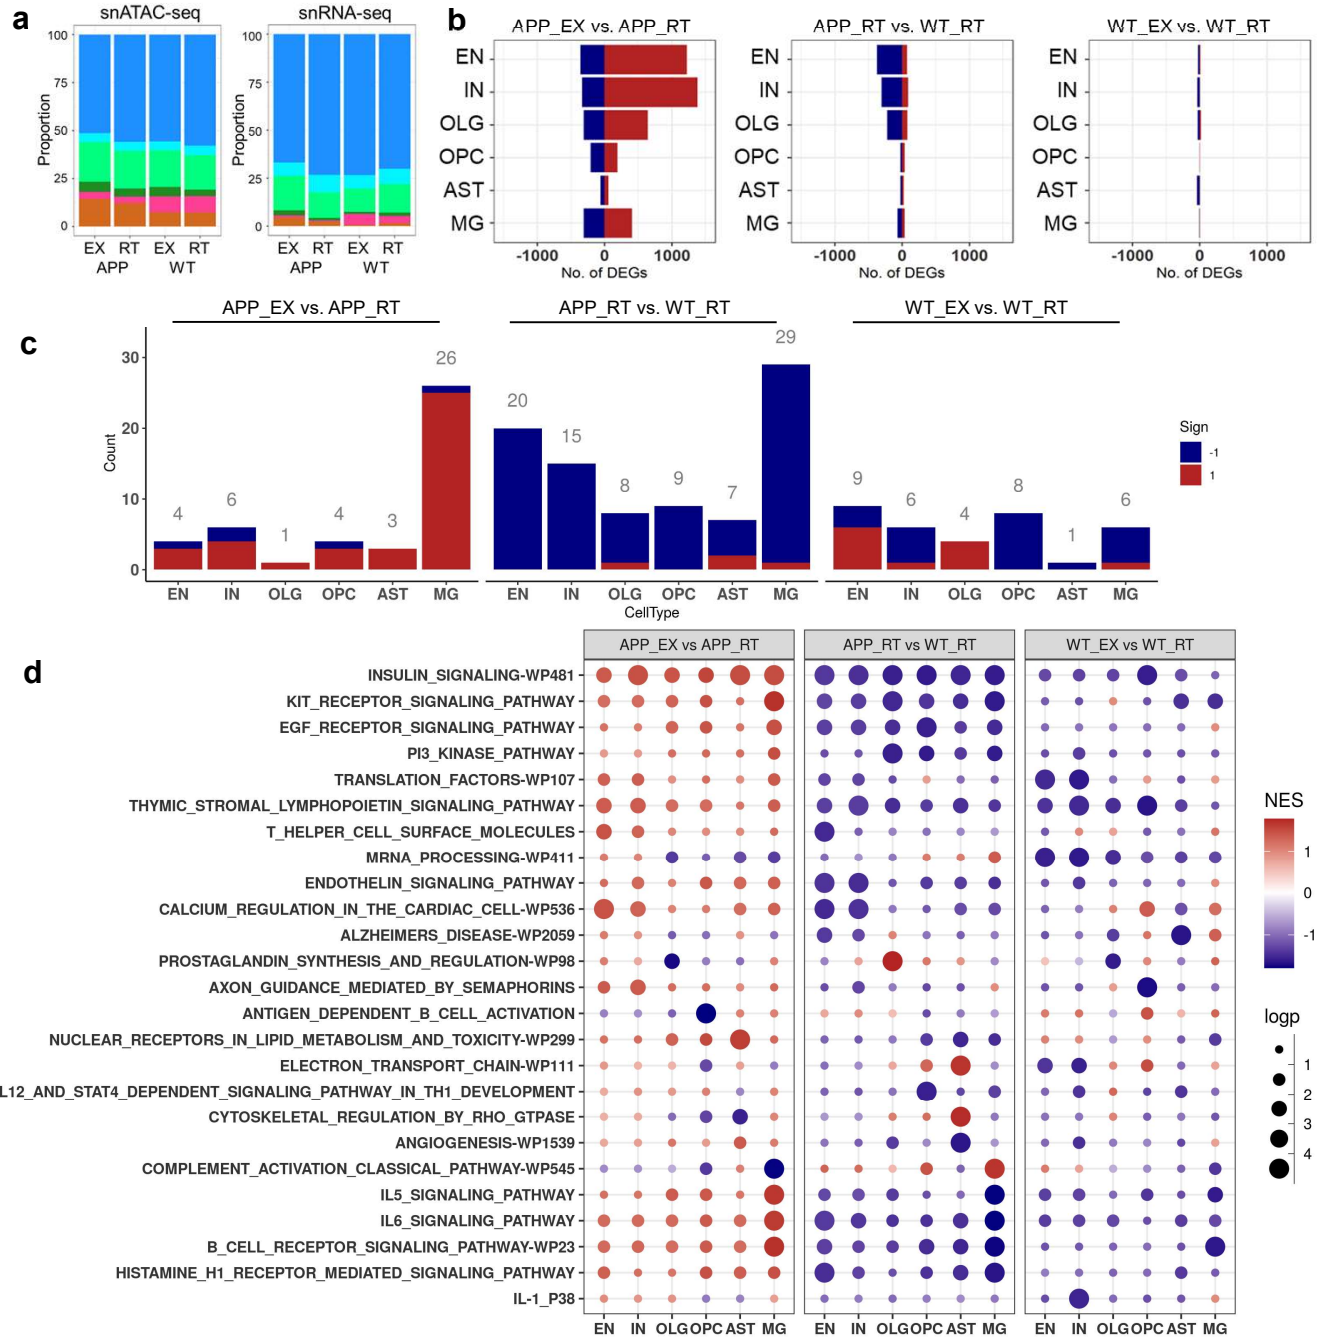

# Supplementary Figure S3

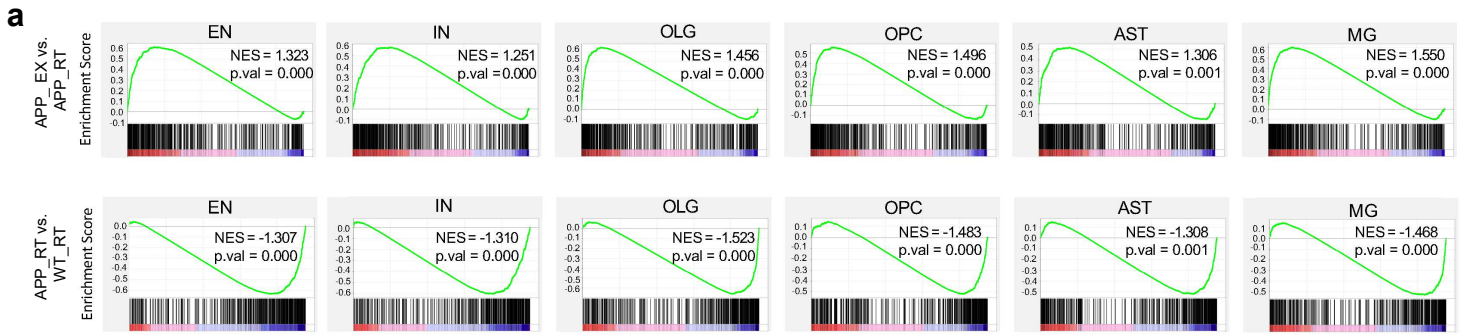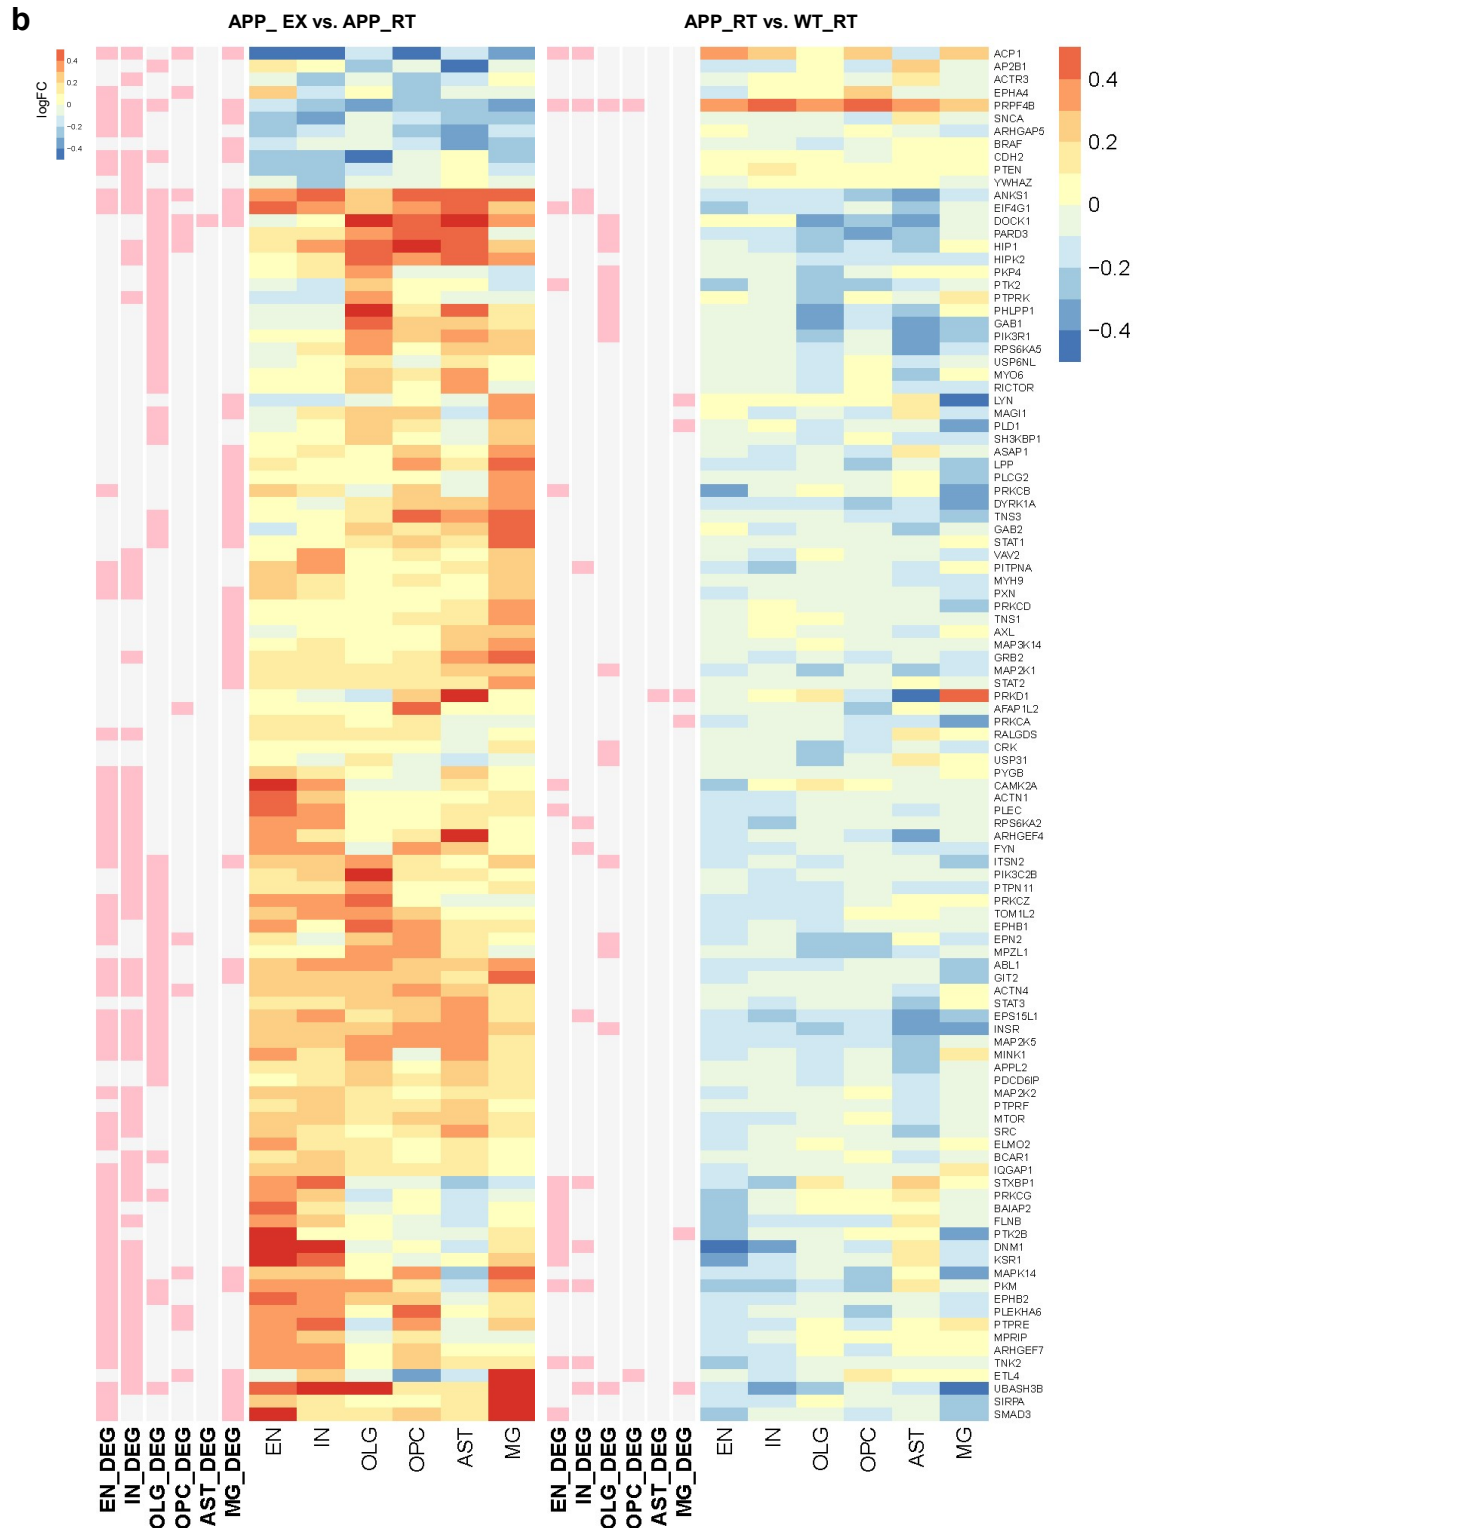

# Supplementary Figure S4

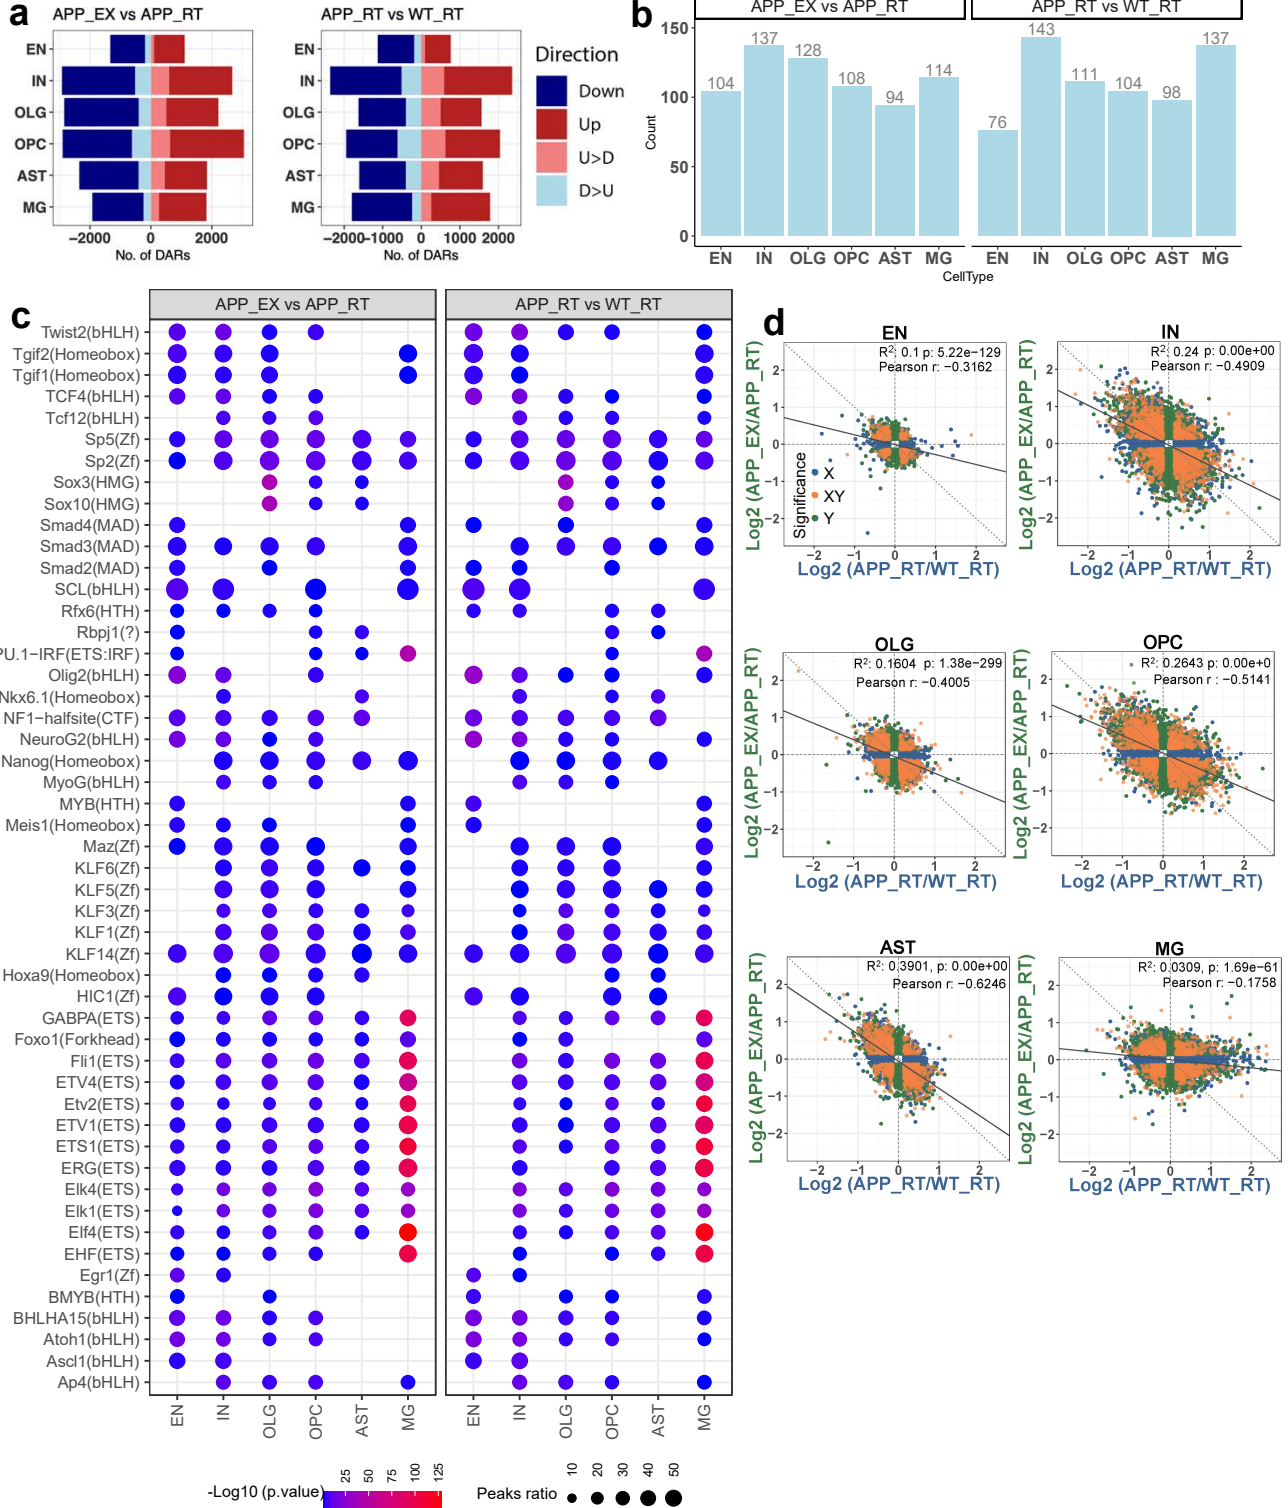

# Supplementary Figure S5

EN: APP\_EX vs. APP\_RT

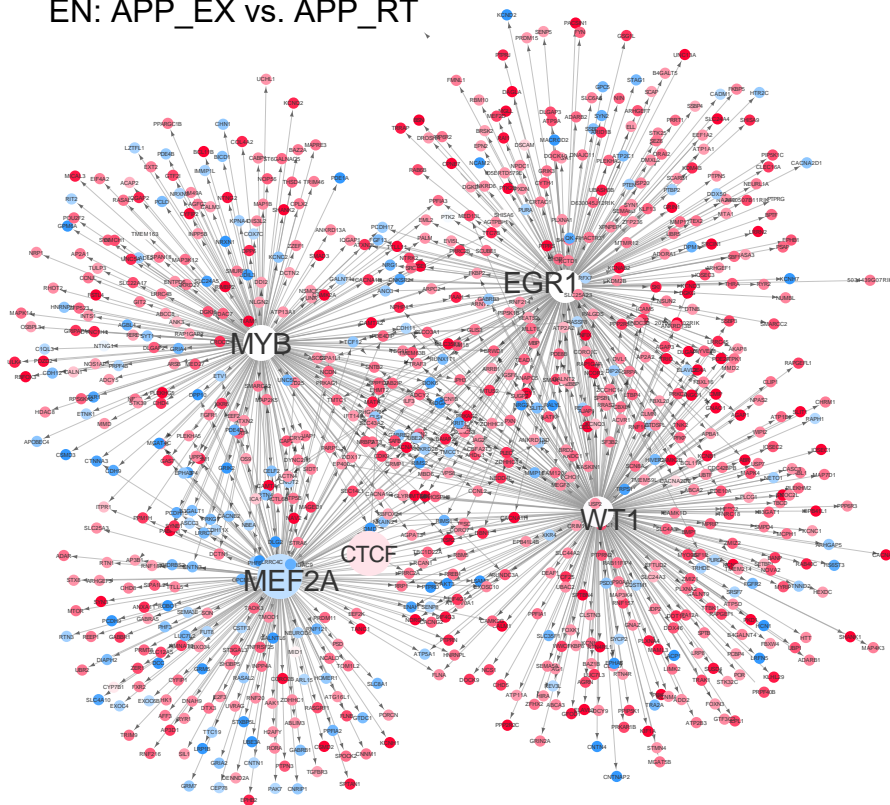

EN: APP\_RT vs. WT\_RT

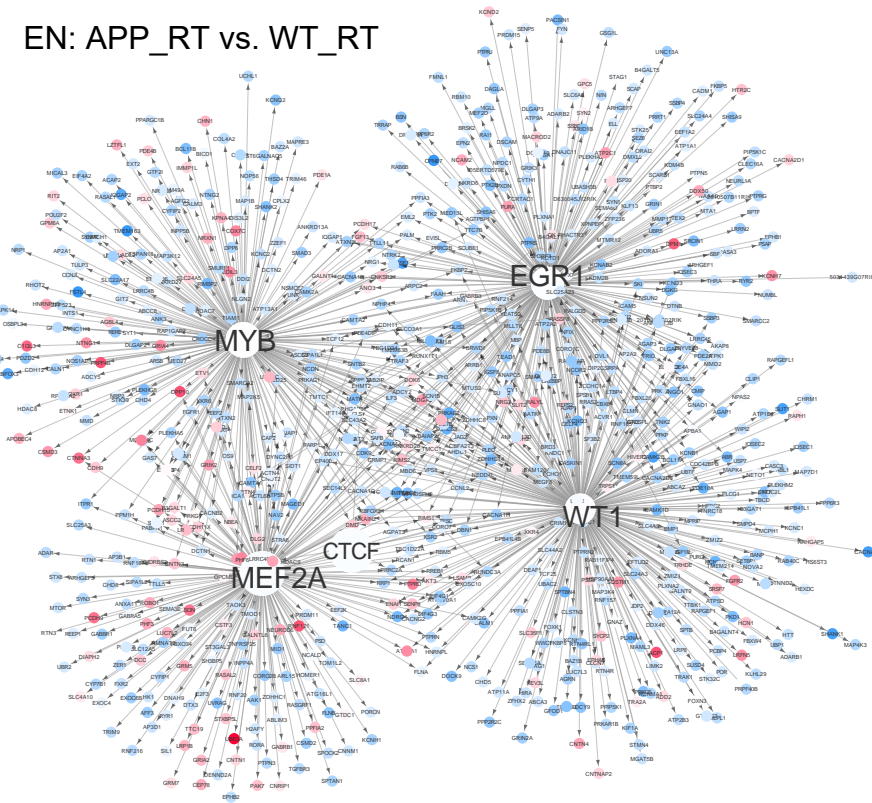

Supplementary Figure S6

IN: APP\_EX vs. APP\_RT

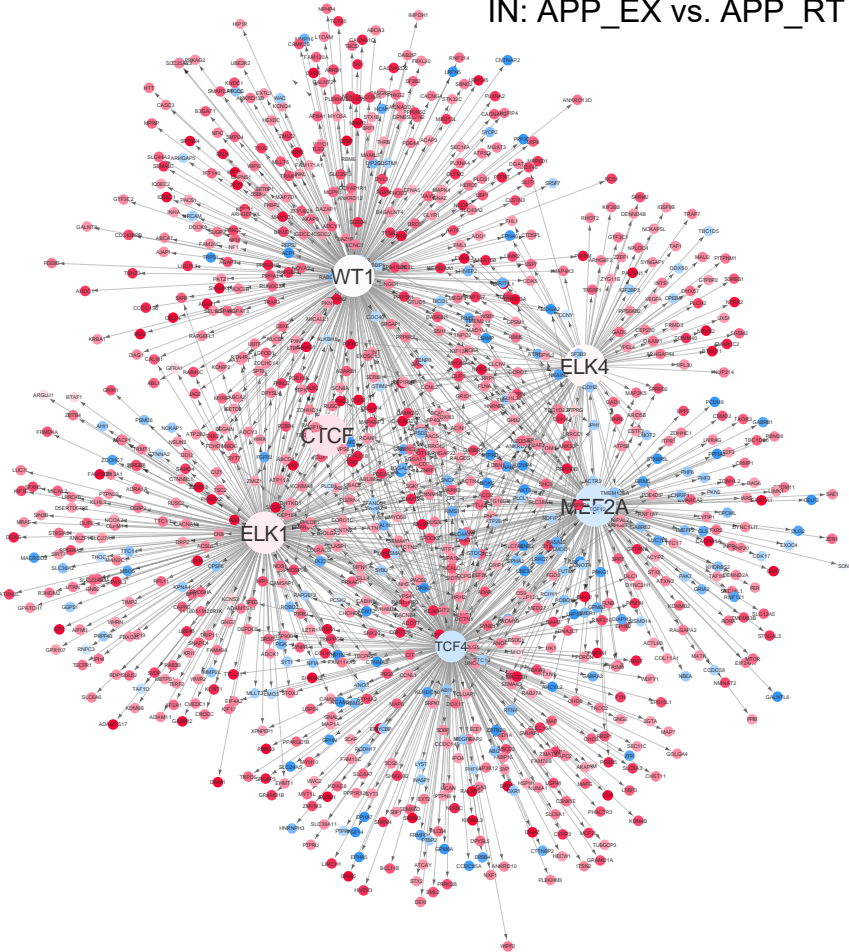

IN: APP\_RT vs. WT\_RT

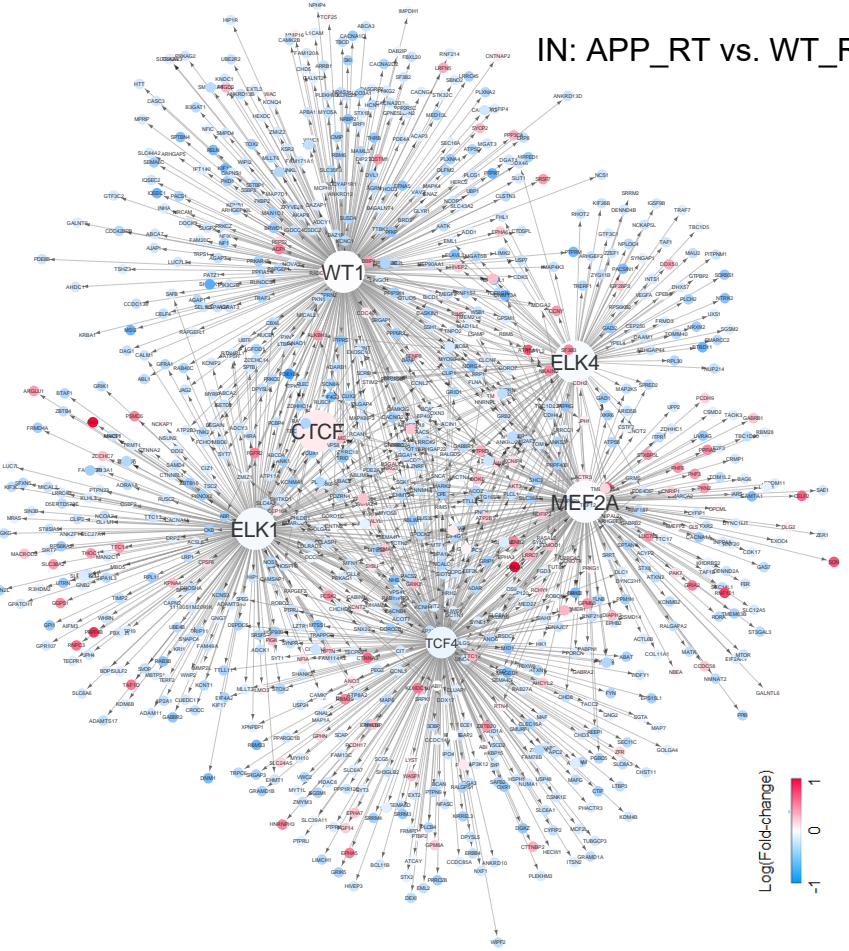

Supplementary Figure S7

OLG: APP\_EX vs. APP\_RT

OLG: APP\_RT vs. WT\_RT

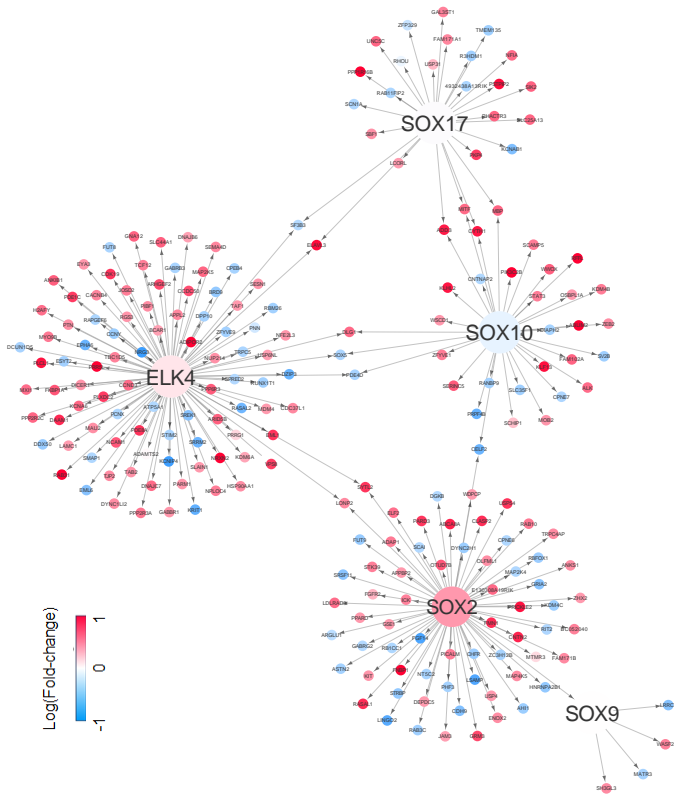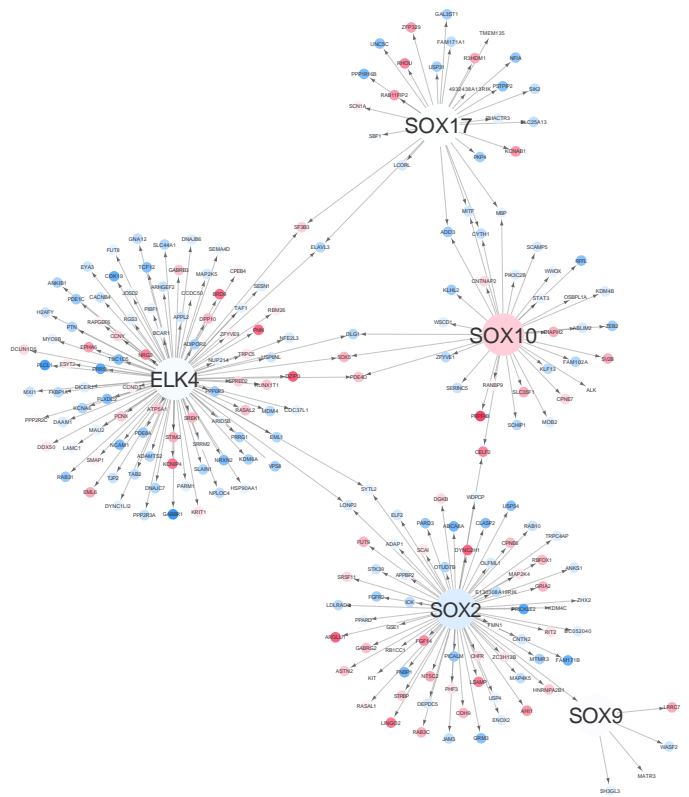

Log(Fold-change)  
-1 0 1



Supplementar Figure S8

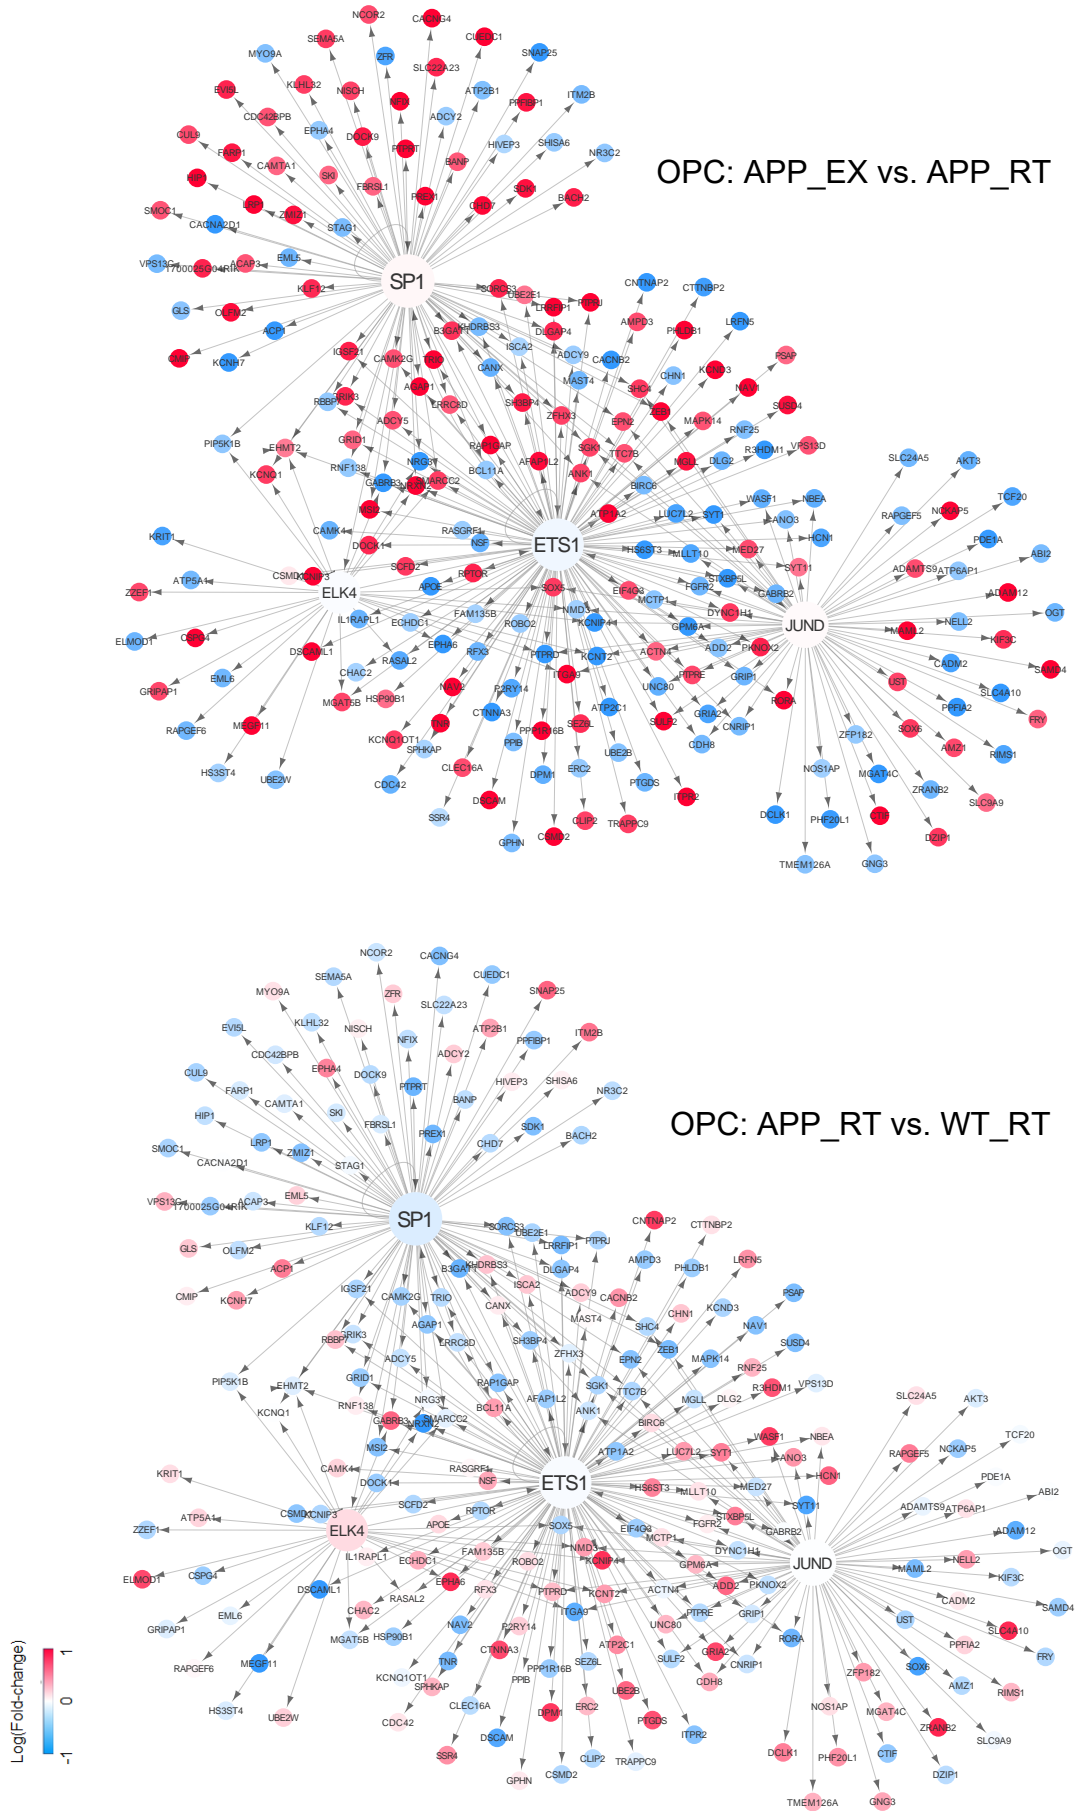

# Supplementary Fig S9

## AST: APP\_EX vs. APP\_RT

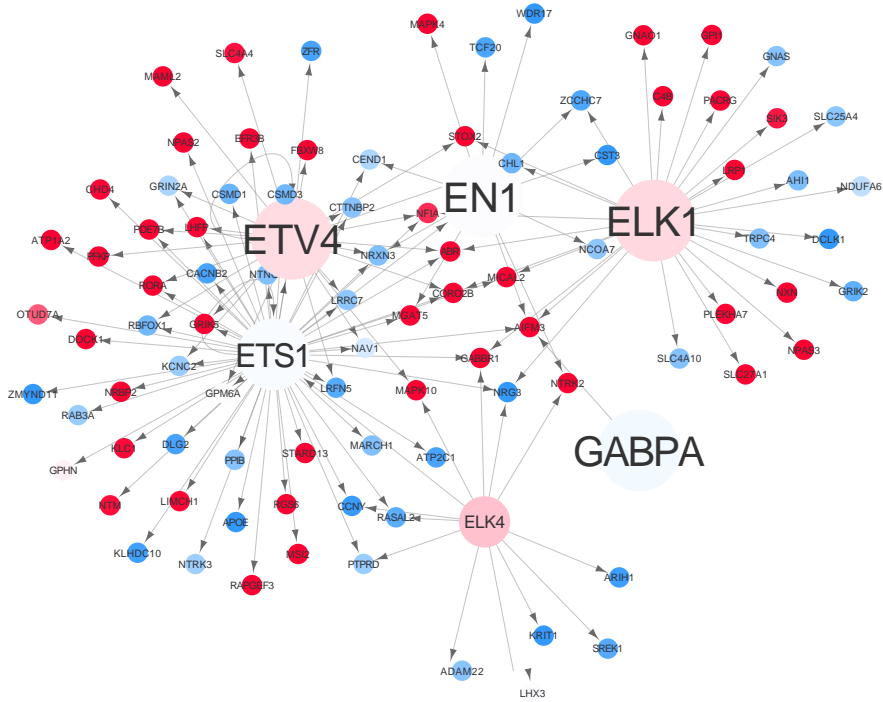

## AST: APP\_RT vs. WT\_RT

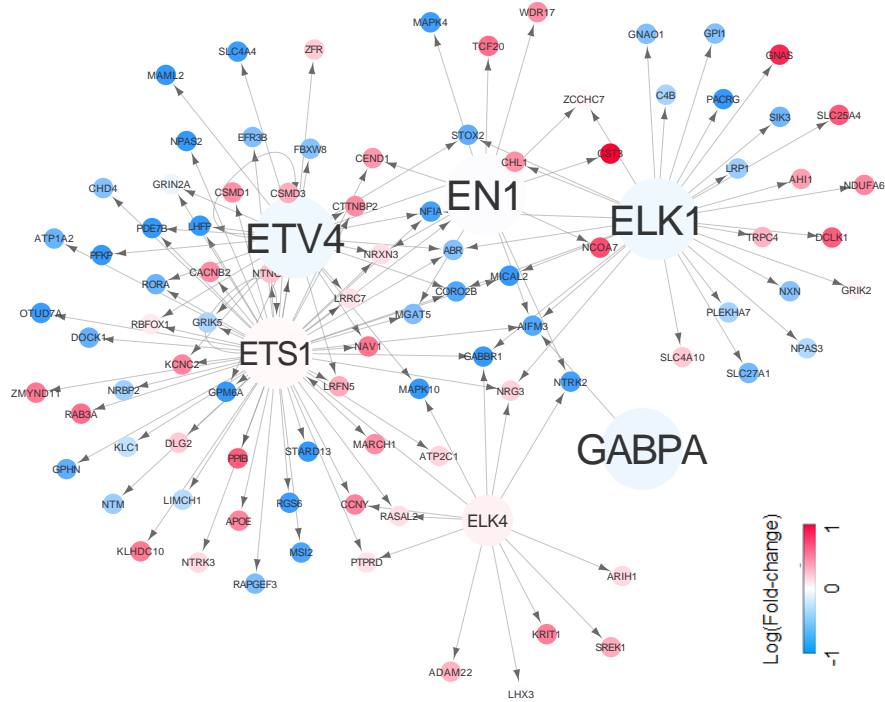

Supplementary Fig S10

MG: APP\_EX vs. APP\_RT

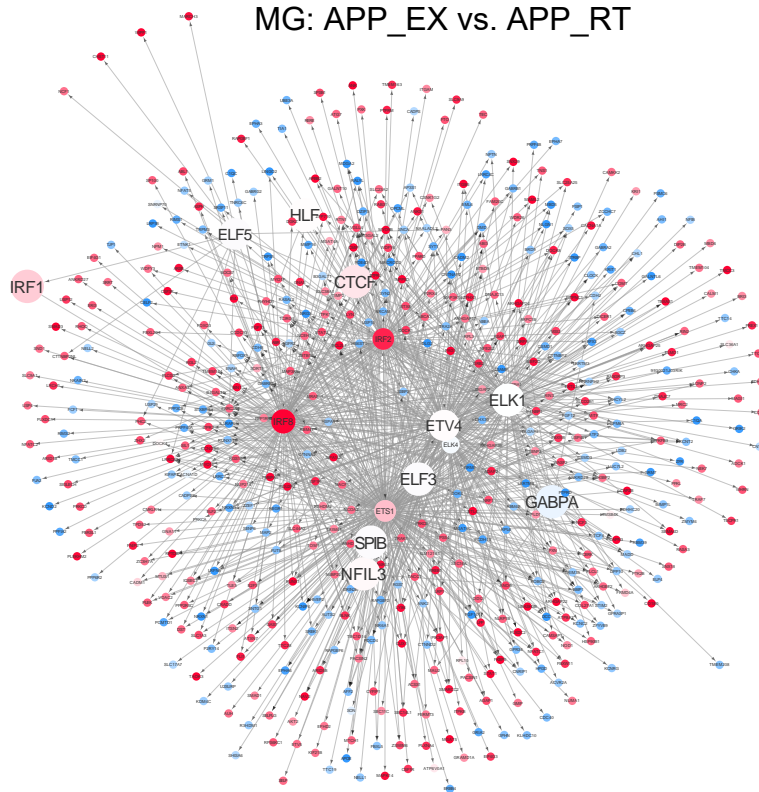

MG: APP\_RT vs. WT\_RT

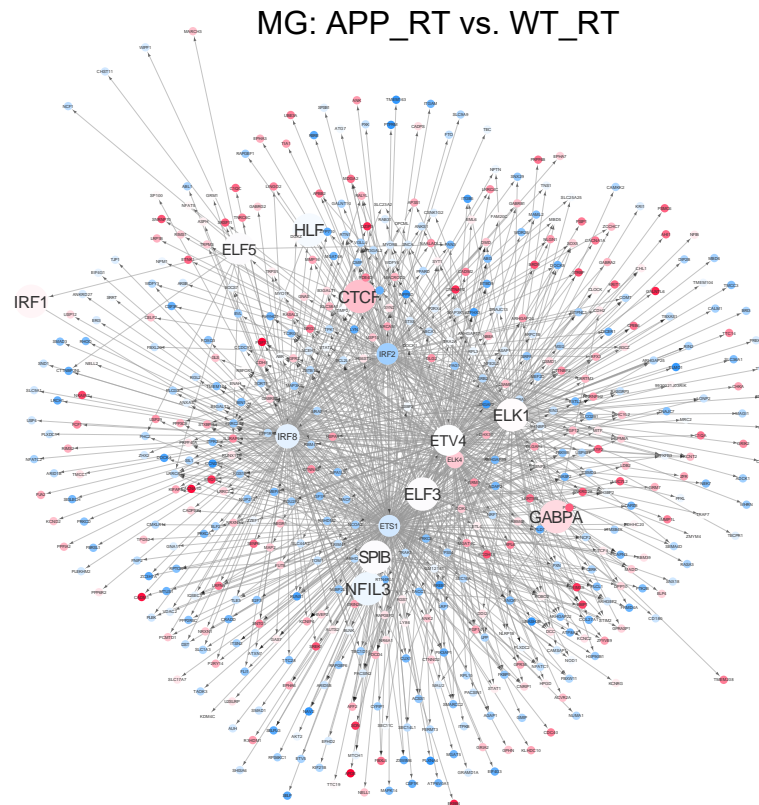

Log(Fold-change)  
-1 0 1

# Supplementary Figure S11

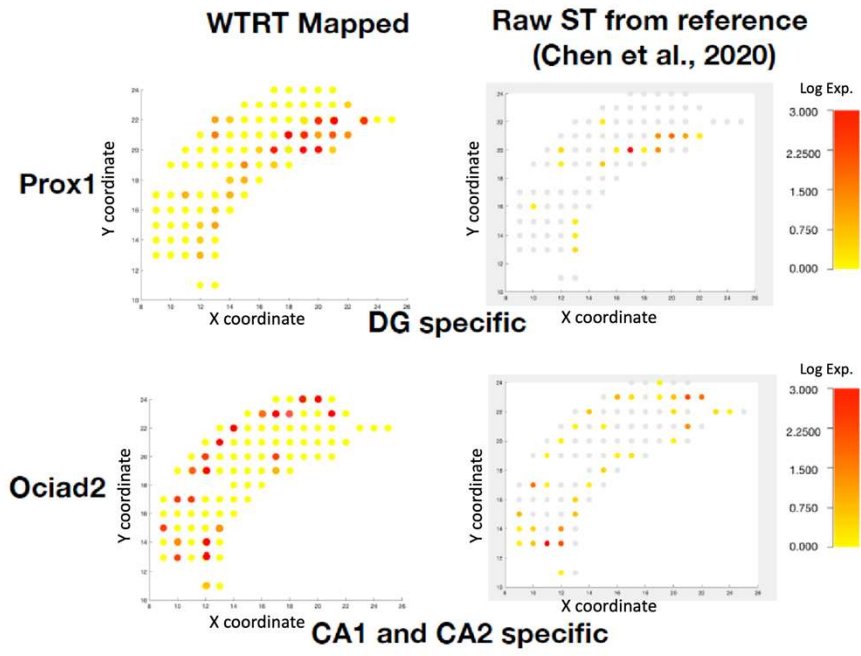

Supplement: media-1.pdf [file media-1.pdf]
